# Supplementary material
Source: Springer Nature journal article supplement (https://www.springermedizin.de/resource/supplementary/12967_2009_351_MOESM4_ESM.pdf/9576282)

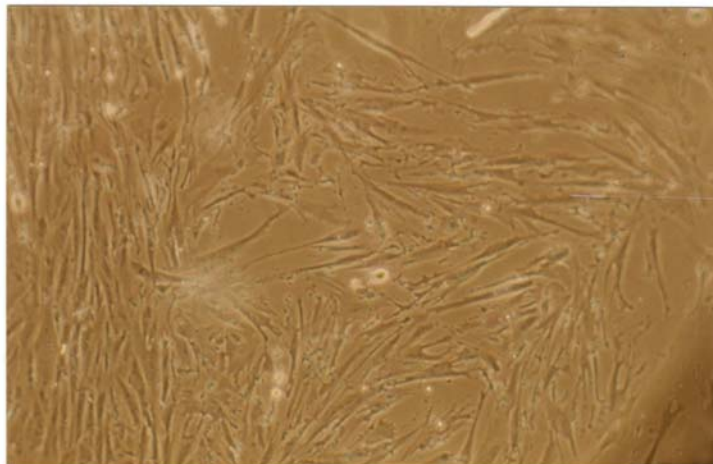

Control

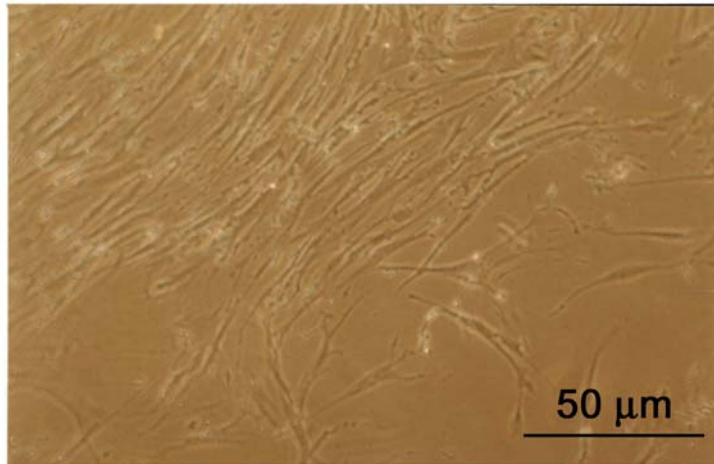

Celiac

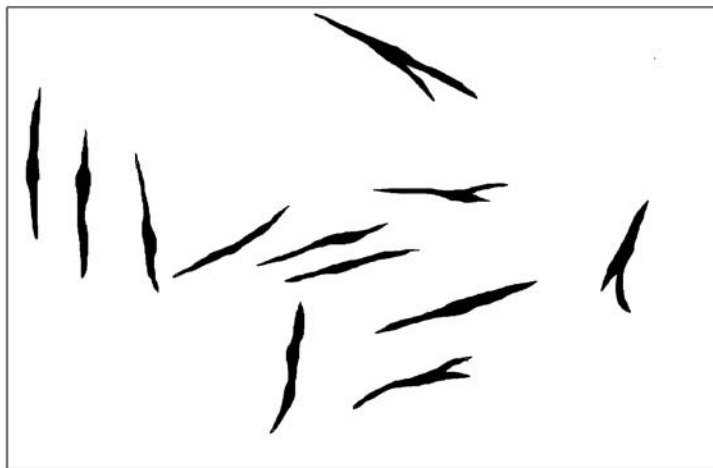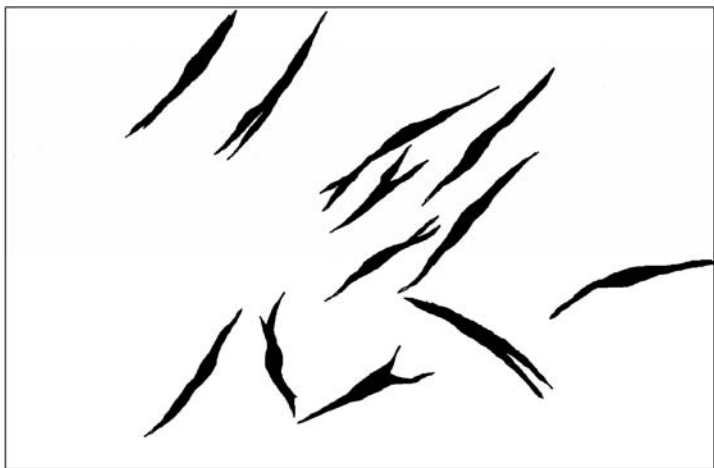

Supplement: MOESM4 [file 9576282]
